# Supplementary material for: Characterization of Chicken Skin Yellowness and Exploration of Genes Involved in Skin Yellowness Deposition in Chicken
Source: Frontiers journal article supplement (doi:10.3389/fphys.2021.585089), 2021-03-31
Supplement: Data_Sheet_1.xls [file Data_Sheet_1.xls]

## Sheet: Sheet1
The valid reads from the two libraries via Illumina2000 deep sequencing.
sample	Total Raw Reads(M)	Total Clean Reads(M)	Total Clean Bases(Gb)
s_deep 6402	23.78	23.06	1.15
s_deep 6403	23.78	23.02	1.15
s_deep 7875	23.78	23.02	1.15
s-light6575	23.78	23.01	1.15
s-light6971	23.78	23.04	1.15
s-light8275	23.78	22.98	1.15
Summary of the valid reads from the two libraries
Reads	Samples
	Skin-light		Skin-deep
Total valid reads(M)	23.03	1	23.01	1
Alignment (M)	17.12	74.34	16.21	70.45
Unmapped (M)	17.25	25.66	16.18	29.55
