# Supplementary material for: Characterization of Chicken Skin Yellowness and Exploration of Genes Involved in Skin Yellowness Deposition in Chicken
Source: Frontiers journal article supplement (doi:10.3389/fphys.2021.585089), 2021-03-31
Supplement: Data_Sheet_2.xls [file Data_Sheet_2.xls]

## Sheet: 1
Aim	To identify whether the three BCO2 SNPs are correlated with the skin yellowness value in this experimental population.
Animals	20 chickens with highest yellowness values (cloaca in alive chicken) and 20 chickens with lowest yellowness values. Two-tail samples of skin yellowness value in the 534 chickens.
Method	Genotyping the three SNPs in 40 chickens. In detail, PCR amplified the genomic region containing the BCO2 three yellow skin SNPs, and then conducted genotyping by direct sequencing the PCR product.
Table 1. Genotyping result of the three BCO2 SNPs in chickens with high yellowness value						Table 2. Genotyping result of the three BCO2 SNPs in chicken with low yellowness value
Wing number	BCO2			b* value		Wing number	BCO2			b* value
	SNP-A	SNP-B	SNP-C	cloaca(alive)			SNP-A	SNP-B	SNP-C	cloaca(alive)
6567	AA	GG	GA	13.98		8393	AA	GG	AA	6.39
7844	AA	GG	AA	13.56		6572	AA	GG	GA	6.39
8010	AA	GG	GA	13.05		8342	AA	GG	AA	6.26
7845	AA	GG	AA	12.98		7763	AA	GG	AA	6.22
6819	AA	GG	AA	12.8		7302	AA	GG	GA	6.19
7629	AA	GG	AA	12.71		8295	AA	GG	AA	6.13
9818	AA	GG	AA	12.69		7976	AA	GG	AA	6.09
7072	AA	GG	AA	12.68		6970	AA	GG	AA	6.04
7839	AA	GG	GA	12.64		8132	AA	GG	GA	6.02
7636	AA	GG	AA	12.37		7828	AA	GG	AA	5.99
6474	AA	GG	AA	12.28		8002	AA	GG	AA	5.96
6402	AA	GG	AA	11.96		9708	AA	GG	AA	5.85
6335	AA	GG	AA	11.94		7919	AA	GG	AA	5.78
8423	AA	GG	AA	11.84		7392	AA	GG	AA	5.62
7846	AA	GG	GA	11.82		8144	AA	GG	AA	5.44
8426	AA	GG	AA	11.74		6523	AA	GG	AA	5.18
6477	AA	GG	AA	11.68		6785	AA	GG	AA	5.15
8215	AA	GG	GA	11.6		6471	AA	GG	AA	4.77
9838	AA	GG	AA	11.55		8098	AA	GG	AA	4.75
6480	AA	GG	AA	11.53		8026	AA	GG	AA	4.5

## Sheet: Sheet1
								1	6.39		AA	1
Table 1 the genotypes of the three BCO2 SNPs in the highest yellowness value group								2	6.39		GA	2
Wing number	BCO2			b* value				1	6.26
	SNP-A	SNP-B	SNP-C	cloaca(alive)				1	6.22
6567	AA	GG	GA	13.98				2	6.19
7844	AA	GG	AA	13.56				1	6.13
8010	AA	GG	GA	13.05				1	6.09
7845	AA	GG	AA	12.98				1	6.04
6819	AA	GG	AA	12.8				2	6.02
7629	AA	GG	AA	12.71				1	5.99
9818	AA	GG	AA	12.69				1	5.96
7072	AA	GG	AA	12.68				1	5.85
7839	AA	GG	GA	12.64				1	5.78
7636	AA	GG	AA	12.37				1	5.62
6474	AA	GG	AA	12.28				1	5.44
6402	AA	GG	AA	11.96				1	5.18
6335	AA	GG	AA	11.94				1	5.15
8423	AA	GG	AA	11.84				1	4.77
7846	AA	GG	GA	11.82				1	4.75
8426	AA	GG	AA	11.74				1	4.5
6477	AA	GG	AA	11.68
8215	AA	GG	GA	11.6
9838	AA	GG	AA	11.55
6480	AA	GG	AA	11.53
