# Supplementary material for: Characterization of Chicken Skin Yellowness and Exploration of Genes Involved in Skin Yellowness Deposition in Chicken
Source: Frontiers journal article supplement (doi:10.3389/fphys.2021.585089), 2021-03-31
Supplement: Data_Sheet_3.xls [file Data_Sheet_3.xls]

## Sheet: 1
Raw data		b*
the highest yellowness value group	Wing number	SNP-C	Cloaca (alive)	Cloaca (after slaughter)	Back	Saddle	Abdomen	Breast	Thigh	Shank	Abdominal fat
1	6567	GA	13.98	8.47	1.52	5.15	8.75	7.96	1.8	7.54	16.64
3	8010	GA	13.05	6.4	5.07	7.42	7.8	8.7	3.87	6.44	10.75
9	7839	GA	12.64	8.86	1.98	10.5	8.18	5.59	2.57	10.43	19.98
15	7846	GA	11.82	6.75	4.16	10.05	6.39	10.59	5.54	7.24	9.22
18	8215	GA	11.6	10.91	6.62	8.54	12.48	12.2	3.91	15.31	12.71
2	7844	AA	13.56	7.54	3.05	6.54	9.71	7.87	-0.1	8.24	0
4	7845	AA	12.98	10.87	4.49	7.76	7.7	8.42	3.26	5.95	8.89
5	6819	AA	12.8	9.09	0.54	8.44	5.04	7.52	0.88	12.43	24.16
6	7629	AA	12.71	7.78	4.28	7.31	6.47	9.98	2.54	8.92	19.68
7	9818	AA	12.69	9.31	6.44	7.12	10.33	10.51	5.73	8.92	15.56
8	7072	AA	12.68	5.3	4.65	5.16	7.39	10.37	3.43	4.97	14.34
10	7636	AA	12.37	6.04	3.1	5.03	6.74	8.35	0.07	9.96	11.88
11	6474	AA	12.28	6.35	3.71	5.67	2.38	7.01	0.71	6.64	7.32
12	6402	AA	11.96	13	3.02	11.64	7.26	6.36	1.72	13.62	17.12
13	6335	AA	11.94	9.94	4.23	7.66	10.29	12.49	4.85	9.61	14.41
14	8423	AA	11.84	6.53	4.38	8.23	7.08	7.59	3.84	5.22	0
16	8426	AA	11.74	3.71	2.88	6.4	3.39	8.68	1.45	8.89	11.47
17	6477	AA	11.68	9.17	6.21	7.68	6.46	10.45	7.41	9.71	10.84
19	9838	AA	11.55	10.12	4.57	9.31	9	7.94	4.8	9.88	9.91
20	6480	AA	11.53	7.21	6.88	8.38	9.99	5.8	3.14	3.41	10.94
		average	12.37	8.1675	4.089	7.6995	7.6415	8.719	3.071	8.6665	12.291
		average	Cloaca (alive)	Cloaca (after slaughter)	Back	Saddle	Abdomen	Breast	Thigh	Shank	Abdominal fat
		GA	12.618	8.278	3.87	8.332	8.72	9.008	3.538	9.392	13.86
		AA	12.2873	8.13067	4.162	7.48867	7.282	8.62267	2.91533	8.42467	11.768
		b*
the lowest yellowness value group	Wing number	SNP-A/B/C	Cloaca (alive)	Cloaca (after slaughter)	Back	Saddle	Abdomen	Breast	Thigh	Shank	Abdominal fat
2	6572	GA	6.39	3.75	3.68	6.18	8.45	6.77	1.31	6.77	6.56
5	7302	GA	6.19	7.7	4.84	6.53	6	7.5	3.44	5.33	8.26
9	8132	GA	6.02	6.42	2.3	5.01	6.95	7.57	3.24	5.58	12.15
1	8393	AA	6.39	5.52	7.3	7.96	8.53	1.56	7.19	15.71	0
3	8342	AA	6.26	7.39	4.66	6.39	7.31	7.41	-0.06	5.86	10.4
4	7763	AA	6.22	5.74	3.1	6.83	6.89	9.02	1.5	6.62	11.82
6	8295	AA	6.13	5.63	4.51	7.45	4.79	6.49	1.99	7.93	11.34
7	7976	AA	6.09	10.64	8.7	6.3	6	5.43	0.85	10.2	15.17
8	6970	AA	6.04	6.65	4.34	6.49	7.11	5.65	2	7.94	11.16
10	7828	AA	5.99	2.92	3.51	3.9	3.89	-0.64	-0.12	4.06	11.75
11	8002	AA	5.96	0	0	0	0	0	0	0	0
12	9708	AA	5.85	5.24	2.58	5.02	2.4	3.84	-0.2	2.83	10.97
13	7919	AA	5.78	11.64	6.69	11.44	6.65	6.77	4.54	5.65	14.75
14	7392	AA	5.62	6.55	3.17	3.54	6.55	9.05	2.04	5.34	12.57
15	8144	AA	5.44	7.4	1.56	5.7	4.91	2.45	3.75	3.29	21.03
16	6523	AA	5.18	5.45	2.62	5.04	3.57	4.38	-0.98	2.91	18.05
17	6785	AA	5.15	10.13	3.15	6.73	8.11	7.32	-1.88	8.81	16.23
18	6471	AA	4.77	5.33	3.38	7.44	6.65	9.1	5.75	9.17	13.3
19	8098	AA	4.75	6	3.75	6.5	4.27	6.12	2.16	5.25	6.15
20	8026	AA	4.5	5.71	3	3.93	6.21	5.61	-1.3	7.64	12.17
		average	5.736	6.2905	3.842	5.919	5.762	5.57	1.761	6.3445	11.1915
		average	Cloaca (alive)	Cloaca (after slaughter)	Back	Saddle	Abdomen	Breast	Thigh	Shank	Abdominal fat
		GA	6.2	5.95667	3.60667	5.90667	7.13333	7.28	2.66333	5.89333	8.99
		AA	5.65412	6.34941	3.88353	5.92118	5.52	5.26824	1.60176	6.42412	11.58
			Cloaca (alive)	Cloaca (after slaughter)	Back	Saddle	Abdomen	Breast	Thigh	Shank	Abdominal fat
	the highest yellowness value group	GA	12.618	8.278	3.87	8.332	8.72	9.008	3.538	9.392	13.86
		AA	12.2873	8.13067	4.162	7.48867	7.282	8.62267	2.91533	8.42467	11.768
	the lowest yellowness value group	GA	6.2	5.95667	3.60667	5.90667	7.13333	7.28	2.66333	5.89333	8.99
		AA	5.65412	6.34941	3.88353	5.92118	5.52	5.26824	1.60176	6.42412	11.58
		average-GA	9.409	7.11733	3.73833	7.11933	7.92667	8.144	3.10067	7.64267	11.425
		average-AA	8.97073	7.24004	4.02276	6.70492	6.401	6.94545	2.25855	7.42439	11.674
Table Correlation Analysis of Yellowness value and SNP-C of BCO2 (Mean ± SE)
	P-value	SNPs of BCO2
		AA(32)	GA(8)
Cloaca (alive)	0.29	10.21±3.4	8.76±3.41
Cloaca (after slaughter)	0.83	7.41±2.12	7.18±2.7
Back	0.74	3.77±1.75	4.01±1.86
Saddle	0.382	7.42±2.1	6.66±2.21
Abdomen	0.063	8.13±2.02	6.35±2.42
Breast	0.187	8.36±2.12	6.84±3
Thigh	0.274	3.21±1.33	2.22±2.42
Shank	0.589	8.08±3.32	7.36±3.34
Abdominal fat	0.87	12.03±4.45	11.67±5.86

## Sheet: Sheet2
		b*
the highest yellowness value group	Wing number	SNP-A/B/C	Cloaca (alive)	Cloaca (after slaughter)	Back	Saddle	Abdomen	Breast	Thigh	Shank	Abdominal fat			泄殖腔（活得）	泄殖腔（去毛）	肩膀	臀	腹部	胸	腿	胫	腹脂
1	6567	AAGGGA	13.98	8.47	1.52	5.15	8.75	7.96	1.8	7.54	16.64		AAGGGA	12.618	8.278	3.87	8.332	8.72	9.008	3.538	9.392	13.86
3	8010	AAGGGA	13.05	6.4	5.07	7.42	7.8	8.7	3.87	6.44	10.75		AAGGAA	12.2873	8.13067	4.162	7.48867	7.282	8.62267	2.91533	8.42467	11.768
9	7839	AAGGGA	12.64	8.86	1.98	10.5	8.18	5.59	2.57	10.43	19.98
15	7846	AAGGGA	11.82	6.75	4.16	10.05	6.39	10.59	5.54	7.24	9.22
18	8215	AAGGGA	11.6	10.91	6.62	8.54	12.48	12.2	3.91	15.31	12.71
2	7844	AAGGAA	13.56	7.54	3.05	6.54	9.71	7.87	-0.1	8.24	0
4	7845	AAGGAA	12.98	10.87	4.49	7.76	7.7	8.42	3.26	5.95	8.89
5	6819	AAGGAA	12.8	9.09	0.54	8.44	5.04	7.52	0.88	12.43	24.16
6	7629	AAGGAA	12.71	7.78	4.28	7.31	6.47	9.98	2.54	8.92	19.68
7	9818	AAGGAA	12.69	9.31	6.44	7.12	10.33	10.51	5.73	8.92	15.56
8	7072	AAGGAA	12.68	5.3	4.65	5.16	7.39	10.37	3.43	4.97	14.34
10	7636	AAGGAA	12.37	6.04	3.1	5.03	6.74	8.35	0.07	9.96	11.88
11	6474	AAGGAA	12.28	6.35	3.71	5.67	2.38	7.01	0.71	6.64	7.32
12	6402	AAGGAA	11.96	13	3.02	11.64	7.26	6.36	1.72	13.62	17.12
13	6335	AAGGAA	11.94	9.94	4.23	7.66	10.29	12.49	4.85	9.61	14.41
14	8423	AAGGAA	11.84	6.53	4.38	8.23	7.08	7.59	3.84	5.22	0
16	8426	AAGGAA	11.74	3.71	2.88	6.4	3.39	8.68	1.45	8.89	11.47
17	6477	AAGGAA	11.68	9.17	6.21	7.68	6.46	10.45	7.41	9.71	10.84
19	9838	AAGGAA	11.55	10.12	4.57	9.31	9	7.94	4.8	9.88	9.91
20	6480	AAGGAA	11.53	7.21	6.88	8.38	9.99	5.8	3.14	3.41	10.94
		average	12.37	8.1675	4.089	7.6995	7.6415	8.719	3.071	8.6665	12.291
		b*
the lowest yellowness value group	Wing number	SNP-A/B/C	Cloaca (alive)	Cloaca (after slaughter)	Back	Saddle	Abdomen	Breast	Thigh	Shank	Abdominal fat			泄殖腔（活得）	泄殖腔（去毛）	肩膀	臀	腹部	胸	腿	胫	腹脂
2	6572	AAGGGA	6.39	3.75	3.68	6.18	8.45	6.77	1.31	6.77	6.56		AAGGGA	6.2	5.95667	3.60667	5.90667	7.13333	7.28	2.66333	5.89333	8.99
5	7302	AAGGGA	6.19	7.7	4.84	6.53	6	7.5	3.44	5.33	8.26		AAGGAA	5.65412	6.34941	3.88353	5.92118	5.52	5.26824	1.60176	6.42412	11.58
9	8132	AAGGGA	6.02	6.42	2.3	5.01	6.95	7.57	3.24	5.58	12.15
1	8393	AAGGAA	6.39	5.52	7.3	7.96	8.53	1.56	7.19	15.71	0
3	8342	AAGGAA	6.26	7.39	4.66	6.39	7.31	7.41	-0.06	5.86	10.4
4	7763	AAGGAA	6.22	5.74	3.1	6.83	6.89	9.02	1.5	6.62	11.82
6	8295	AAGGAA	6.13	5.63	4.51	7.45	4.79	6.49	1.99	7.93	11.34
7	7976	AAGGAA	6.09	10.64	8.7	6.3	6	5.43	0.85	10.2	15.17
8	6970	AAGGAA	6.04	6.65	4.34	6.49	7.11	5.65	2	7.94	11.16
10	7828	AAGGAA	5.99	2.92	3.51	3.9	3.89	-0.64	-0.12	4.06	11.75
11	8002	AAGGAA	5.96	0	0	0	0	0	0	0	0
12	9708	AAGGAA	5.85	5.24	2.58	5.02	2.4	3.84	-0.2	2.83	10.97
13	7919	AAGGAA	5.78	11.64	6.69	11.44	6.65	6.77	4.54	5.65	14.75
14	7392	AAGGAA	5.62	6.55	3.17	3.54	6.55	9.05	2.04	5.34	12.57
15	8144	AAGGAA	5.44	7.4	1.56	5.7	4.91	2.45	3.75	3.29	21.03
16	6523	AAGGAA	5.18	5.45	2.62	5.04	3.57	4.38	-0.98	2.91	18.05
17	6785	AAGGAA	5.15	10.13	3.15	6.73	8.11	7.32	-1.88	8.81	16.23
18	6471	AAGGAA	4.77	5.33	3.38	7.44	6.65	9.1	5.75	9.17	13.3
19	8098	AAGGAA	4.75	6	3.75	6.5	4.27	6.12	2.16	5.25	6.15
20	8026	AAGGAA	4.5	5.71	3	3.93	6.21	5.61	-1.3	7.64	12.17
		average	5.736	6.2905	3.842	5.919	5.762	5.57	1.761	6.3445	11.1915
