# Supplementary material for: Characterization of Chicken Skin Yellowness and Exploration of Genes Involved in Skin Yellowness Deposition in Chicken
Source: Front Physiol. 2021 Mar 31;12:585089. doi: 10.3389/fphys.2021.585089 (PMC8044320; doi:10.3389/fphys.2021.585089)
Supplement: Supplementary file 3 [file Table_1.XLS]

## Sheet: Sheet1
Skin colour categories
	yellow				pale yellow				nearly white
wing number	S1	H1	HSV	wing number	S2	H2	HSV	wing number	S3	H3	HSV
7464	0.5069	0.0962	0.4767	7072	0.3696	0.0833	0.3137	7509	0.2711	0.0909	0.2715
6406	0.575	0.0986	0.4667	6819	0.3253	0.0852	0.3137	7347	0.2581	0.0729	0.2714
6335	0.4615	0.0889	0.4491	7571	0.3097	0.0741	0.3133	7755	0.2933	0.0789	0.2706
6978	0.527	0.0939	0.4471	6468	0.313	0.0782	0.313	6675	0.2663	0.0693	0.2705
7523	0.4533	0.0909	0.4235	9883	0.3115	0.0778	0.3125	6736	0.2692	0.0733	0.2701
9865	0.4906	0.0923	0.4179	7538	0.3089	0.0746	0.3125	6658	0.2671	0.0769	0.2701
6930	0.4176	0.0813	0.4145	7003	0.3038	0.078	0.3121	6922	0.2538	0.0738	0.2692
7553	0.4247	0.0847	0.4133	6458	0.3097	0.0731	0.3116	7517	0.2647	0.0747	0.269
7288	0.4151	0.0861	0.4127	7726	0.3083	0.0817	0.311	8186	0.2661	0.0732	0.2679
7333	0.4211	0.0814	0.4079	7269	0.3095	0.0774	0.3107	7883	0.2656	0.0769	0.2677
7766	0.4314	0.0817	0.4059	6409	0.3103	0.0909	0.3103	7306	0.2588	0.0648	0.2671
7845	0.4194	0.0817	0.4056	9811	0.3077	0.0746	0.3082	6824	0.2663	0.0684	0.2671
7544	0.4025	0.0732	0.4024	7893	0.3084	0.0833	0.3077	7515	0.2584	0.0711	0.2667
6495	0.3984	0.0769	0.4012	6710	0.3061	0.0714	0.3073	7105	0.2646	0.0807	0.2663
6979	0.5074	0.0899	0.4	7076	0.3067	0.0748	0.3071	6719	0.2614	0.0732	0.2662
6958	0.4194	0.0847	0.4	7249	0.3047	0.0778	0.3059	6925	0.2568	0.0733	0.2657
7292	0.4113	0.0774	0.3961	7181	0.3929	0.0857	0.3059	6657	0.2634	0.0741	0.2654
6692	0.4101	0.0845	0.3926	6404	0.3836	0.0909	0.3059	6705	0.2611	0.0673	0.2652
7855	0.4344	0.0909	0.392	7324	0.3041	0.0736	0.3057	6991	0.2585	0.0729	0.265
7350	0.4078	0.0874	0.3889	6573	0.3038	0.0787	0.3057	6779	0.2634	0.0741	0.2647
7158	0.4218	0.0602	0.3879	7002	0.3026	0.0806	0.3052	7126	0.259	0.0673	0.2643
6715	0.396	0.087	0.3843	7310	0.2929	0.0741	0.3051	6632	0.2548	0.0747	0.2632
7773	0.396	0.0769	0.3836	6377	0.3041	0.0769	0.3048	6480	0.2581	0.0673	0.2632
7180	0.3833	0.0847	0.3832	6743	0.3037	0.0731	0.3046	8295	0.3	0.0833	0.2627
6506	0.3851	0.0833	0.3831	7135	0.2973	0.0769	0.3041	8310	0.2599	0.0833	0.2625
6598	0.3807	0.0741	0.3782	7339	0.3027	0.0877	0.3037	9813	0.2609	0.0747	0.2616
9714	0.381	0.0814	0.3774	7708	0.4154	0.0833	0.3034	7202	0.2543	0.0659	0.2615
7749	0.4	0.0877	0.3765	8480	0.3023	0.0877	0.3028	6360	0.2597	0.078	0.2614
8039	0.4086	0.0747	0.376	6918	0.3012	0.0733	0.3022	7363	0.2486	0.0735	0.2611
8215	0.3791	0.0789	0.3729	7940	0.381	0.0789	0.302	9837	0.2575	0.0652	0.2609
7139	0.3986	0.0833	0.3725	8043	0.3015	0.0741	0.3019	7099	0.2557	0.0714	0.2601
6933	0.376	0.0845	0.3717	7337	0.3193	0.0857	0.3019	6762	0.2567	0.0733	0.2601
7415	0.4019	0.0952	0.3686	8423	0.3	0.0858	0.3018	7136	0.2533	0.0714	0.2598
8029	0.3803	0.0805	0.3684	7518	0.3	0.0817	0.3012	6716	0.2593	0.0833	0.2597
6976	0.369	0.0805	0.3672	6832	0.3689	0.0952	0.3008	6478	0.253	0.0738	0.2597
7144	0.3714	0.0917	0.365	9892	0.2987	0.0741	0.3	7510	0.246	0.0733	0.2595
9801	0.3608	0.0806	0.3642	6466	0.3362	0.0849	0.3	6584	0.25	0.0609	0.2595
6443	0.4109	0.0926	0.3626	9864	0.3731	0.0814	0.2991	6403	0.2549	0.0653	0.2583
9845	0.3793	0.087	0.3623	6566	0.3111	0.0817	0.299	6644	0.2532	0.0688	0.2582
7511	0.3617	0.0857	0.3609	7775	0.3529	0.0789	0.2984	7356	0.2353	0.0667	0.2577
6618	0.3561	0.0738	0.359	7763	0.3488	0.0833	0.298	7161	0.2541	0.0684	0.2569
7765	0.3868	0.0833	0.3586	7577	0.3736	0.0833	0.298	6745	0.268	0.0833	0.2564
8369	0.3594	0.0833	0.3566	7134	0.3846	0.0926	0.298	7156	0.2513	0.0688	0.2558
7392	0.3538	0.0833	0.3562	7524	0.2985	0.0901	0.2979	7210	0.227	0.0729	0.2557
6784	0.3659	0.0874	0.3537	6641	0.2948	0.0741	0.2965	6905	0.2453	0.0737	0.2555
6722	0.3492	0.081	0.3534	7189	0.3279	0.0833	0.2963	7188	0.253	0.0787	0.2963
7093	0.3497	0.0867	0.3529	7077	0.2945	0.0644	0.2961	7543	0.2482	0.0746	0.2543
8214	0.3542	0.0741	0.3504	7290	0.2959	0.0874	0.2959	7225	0.2532	0.0769	0.2542
7846	0.3496	0.0833	0.3494	6542	0.2941	0.0733	0.2956	8193	0.2516	0.087	0.2519
6561	0.3429	0.0806	0.3491	7203	0.2808	0.0738	0.2951	7155	0.2464	0.0729	0.2517
6990	0.3486	0.0833	0.3488	6730	0.2944	0.0877	0.2951	7421	0.247	0.0682	0.2515
7100	0.3485	0.0822	0.3486	8206	0.3689	0.0789	0.2941	6369	0.25	0.0782	0.2513
6725	0.3485	0.0931	0.3486	6927	0.3185	0.0909	0.2941	7818	0.2742	0.0889	0.251
7512	0.3481	0.0833	0.3483	7438	0.2926	0.0787	0.2934	7311	0.2458	0.0833	0.25
6477	0.3466	0.0833	0.3481	6587	0.3628	0.0833	0.2925	6774	0.2414	0.0707	0.25
7680	0.3478	0.0897	0.3478	9896	0.2903	0.0792	0.2914	6663	0.25	0.0729	0.25
6600	0.354	0.0849	0.3462	8500	0.2906	0.0787	0.291	6444	0.2405	0.0769	0.25
7739	0.3423	0.0833	0.3451	8010	0.3115	0.0867	0.2906	6499	0.2462	0.0782	0.2487
7720	0.3448	0.087	0.3451	6635	0.2901	0.078	0.2903	6956	0.2463	0.0682	0.2486
6481	0.4113	0.0847	0.3451	8362	0.3495	0.0833	0.2902	6757	0.2457	0.0729	0.2486
6434	0.3519	0.0897	0.3451	8320	0.3483	0.0923	0.2902	6373	0.2445	0.0729	0.2485
7187	0.3448	0.0847	0.3446	8302	0.3761	0.0897	0.2902	9843	0.248	0.0833	0.2902
6352	0.3413	0.0833	0.3438	7007	0.2869	0.0833	0.2901	7213	0.2387	0.0619	0.2471
7298	0.3404	0.0779	0.3434	6674	0.3333	0.0857	0.2899	6903	0.2407	0.066	0.2471
6317	0.3427	0.0863	0.343	7305	0.2874	0.0792	0.2896	6572	0.24	0.0729	0.2463
7228	0.3425	0.0774	0.3427	6375	0.287	0.0808	0.2892	6841	0.2437	0.0746	0.2461
7839	0.4082	0.0857	0.3423	6322	0.2888	0.0822	0.289	7513	0.2455	0.0735	0.2457
6701	0.3409	0.0782	0.3413	6887	0.2871	0.0738	0.2886	7751	0.2346	0.0863	0.2886
6811	0.3393	0.0909	0.3393	7732	0.2874	0.0795	0.2885	6616	0.2349	0.0688	0.2455
6348	0.3379	0.0915	0.3392	7091	0.2849	0.0782	0.288	6648	0.2375	0.0688	0.245
6666	0.3291	0.0729	0.3391	6709	0.2822	0.0746	0.2875	7073	0.2422	0.078	0.2438
7198	0.3377	0.0741	0.338	7152	0.2838	0.0731	0.2874	6660	0.2421	0.078	0.2432
7303	0.4242	0.0857	0.336	6384	0.2867	0.0741	0.2874	7836	0.2424	0.0789	0.2424
6932	0.3353	0.0711	0.3359	7087	0.2836	0.0798	0.2873	7636	0.2412	0.0746	0.2423
8072	0.3357	0.0843	0.3357	6974	0.2865	0.0769	0.2872	7089	0.2374	0.0741	0.2414
7206	0.3353	0.0833	0.3356	7475	0.2821	0.0703	0.2867	6326	0.2349	0.0732	0.2414
7603	0.3295	0.087	0.333	6751	0.271	0.0644	0.2866	6993	0.2391	0.0769	0.2402
8079	0.354	0.0833	0.3333	9891	0.2857	0.0807	0.2865	6721	0.2335	0.0772	0.2394
7565	0.3333	0.0732	0.3333	7142	0.3438	0.0897	0.2863	7371	0.2333	0.0782	0.2379
7354	0.3353	0.099	0.3333	6875	0.3976	0.0909	0.2863	6667	0.236	0.0769	0.2368
6643	0.3333	0.0774	0.3333	9717	0.2848	0.0741	0.2857	6924	0.2323	0.0787	0.2367
7683	0.329	0.0877	0.331	8174	0.2849	0.0738	0.2857	7598	0.2326	0.0735	0.2362
7201	0.3283	0.0791	0.3286	7615	0.3152	0.0833	0.2857	9807	0.2349	0.0782	0.2857
7540	0.3253	0.078	0.3275	6964	0.2754	0.0747	0.2857	6970	0.2188	0.0652	0.2345
7556	0.3525	0.0877	0.3261	7069	0.2761	0.0782	0.2849	6559	0.2299	0.0741	0.2338
7629	0.4375	0.0833	0.3255	8195	0.2802	0.0774	0.2846	6857	0.2243	0.0735	0.2333
7536	0.324	0.0833	0.3247	6640	0.2802	0.0769	0.2842	7277	0.2312	0.0741	0.2321
6786	0.3234	0.0897	0.3245	7331	0.2821	0.078	0.2841	6497	0.2282	0.0787	0.2319
6630	0.3194	0.08	0.3241	7117	0.2555	0.0729	0.2837	6755	0.2286	0.0741	0.2313
7199	0.3383	0.0789	0.3235	7462	0.2818	0.0729	0.2834	7504	0.2266	0.0735	0.2312
9870	0.323	0.0741	0.3235	7579	0.2899	0.0833	0.2824	7353	0.2234	0.0741	0.2308
8387	0.3235	0.0787	0.3235	7430	0.3692	0.0897	0.2824	6892	0.2254	0.0622	0.2294
6910	0.3176	0.0789	0.323	6642	0.2814	0.0814	0.2821	6679	0.2262	0.0707	0.2294
6620	0.3977	0.0877	0.3229	9838	0.2789	0.0868	0.2792	6379	0.2215	0.0741	0.2251
6582	0.3269	0.0833	0.3216	8381	0.2766	0.0833	0.2788	6944	0.2159	0.0688	0.2211
7307	0.3697	0.0938	0.3216	6651	0.2727	0.0746	0.2788	6954	0.215	0.0735	0.2208
6838	0.322	0.0814	0.3216	7583	0.2734	0.0792	0.2785	6500	0.2081	0.0667	0.2199
6389	0.4828	0.0885	0.3216	7097	0.2711	0.0741	0.2784	7127	0.2112	0.0729	0.2195
7326	0.3205	0.0849	0.3207	6996	0.2782	0.0814	0.2783	6684	0.2151	0.0709	0.2184
6596	0.3195	0.0807	0.32	7309	0.2689	0.0814	0.2781	6934	0.2037	0.0667	0.2167
6567	0.3193	0.0833	0.32	7226	0.2774	0.078	0.2778	7133	0.2	0.0697	0.2164
9818	0.3196	0.0792	0.3198	6606	0.2768	0.0747	0.2778	8439	0.2139	0.0789	0.2778
7312	0.3188	0.078	0.3197	7317	0.2747	0.0729	0.2775	6539	0.2095	0.0741	0.215
7341	0.3185	0.0847	0.3188	6358	0.2737	0.0741	0.2771	6441	0.2108	0.0741	0.2147
6654	0.3179	0.0824	0.3188	7110	0.2663	0.0764	0.2768	6604	0.2077	0.0829	0.2146
9900	0.3909	0.0852	0.3182	6775	0.2745	0.0731	0.2763	7397	0.2065	0.0732	0.2134
7824	0.3176	0.0833	0.3179	8379	0.3011	0.0833	0.2759	6563	0.2086	0.0733	0.2123
6621	0.3169	0.0735	0.3179	6445	0.3053	0.0877	0.2745	6474	0.2045	0.0707	0.2102
7707	0.3471	0.0833	0.3176	6575	0.2742	0.078	0.2743	6833	0.2	0.0729	0.2098
7674	0.3592	0.0917	0.3176	7300	0.2733	0.0833	0.2739	7499	0.2043	0.078	0.2093
6605	0.3158	0.0833	0.3171	6554	0.2686	0.0729	0.2737	7325	0.2013	0.0747	0.2092
6988	0.3097	0.0769	0.3168	7364	0.2586	0.0704	0.2732	6971	0.2012	0.0648	0.2086
6731	0.3146	0.0774	0.3168	7227	0.2606	0.0729	0.2732	6926	0.1975	0.0696	0.2053
6433	0.3161	0.0782	0.3161	7153	0.2723	0.0901	0.2727	7171	0.2	0.0673	0.2036
6890	0.3146	0.0769	0.3158	6822	0.2722	0.0729	0.2727	7476	0.1864	0.0635	0.2
9701	0.3148	0.0858	0.3153	6603	0.2708	0.0747	0.2727	6371	0.1919	0.0746	0.1978
8227	0.3455	0.0833	0.3137	6351	0.265	0.0747	0.2727	6680	0.1646	0.0717	0.1914
7676	0.3902	0.0852	0.3137	8469	0.2706	0.0833	0.2722	6844	0.1709	0.0667	0.1905
				7173	0.2698	0.0813	0.272	6689	0.1701	0.0707	0.1854
				6952	0.2709	0.0774	0.2717	6940	0.1471	0.0714	0.1799
								7378	0.1615	0.0688	0.1789
								7376	0.1615	0.0688	0.1789
								6893	0.1747	0.0733
