# Supplementary material for: Characterization of Chicken Skin Yellowness and Exploration of Genes Involved in Skin Yellowness Deposition in Chicken
Source: Frontiers journal article supplement (doi:10.3389/fphys.2021.585089), 2021-03-31
Supplement: Table_2.xls [file Table_2.xls]

## Sheet: Supplementary Table S2
Differentially expressed genes between two groups
Gene ID	Other Gene ID	average-s_deep FPKM	averages_light FPKM	log2(s_light/s_deep)
107057217	LOC107057217	0	8.82	10.01
107054773	LOC107054773	0	1.51	9.06
395095	LOC395095	0	5.87	8.89
101750988	LOC101750988	0	3.43	8.3
421222	MALL	0	1.94	7.56
428512	GALR1	0.02	2.56	7.16
100857367	LOC100857367	0.05	6.95	7.06
107056189	LOC107056189	0	0.6	6.79
107055999	LOC107055999	0	0.86	6.78
417428	CACNG1	0	1.14	6.76
107049311	LOC107049311	0	0.25	6.63
107050127	LOC107050127	0	0.3	6.55
395437	CFC1B	0	0.77	6.49
430657	KRTAP19-2	0	1.59	6.43
107049077	LOC107049077	0	0.55	6.27
396279	SST	0	0.99	6.05
425540	LOC425540	0.11	6.47	5.91
107056369	LOC107056369	0	1.64	5.9
107056090	LOC107056090	0	0.56	5.87
423298	ACTC1	0.24	13.14	5.76
101748438	LOC101748438	0	0.17	5.71
396472	MYL4	0.56	25.45	5.65
100858728	LOC100858728	0	0.57	5.64
107049097	LOC107049097	0	0.62	5.63
107050822	LOC107050822	0.01	0.61	5.6
107056978	LOC107056978	0	0.33	5.59
107049026	LOC107049026	0.08	3.75	5.57
107049038	LOC107049038	0	0.57	5.54
430661	LOC430661	0	0.55	5.5
418726	FHL2	3.08	138.58	5.48
107055120	LOC107055120	0	0.55	5.46
100859790	LOC100859790	0.22	9.35	5.36
100858089	R3HDML	0	0.28	5.32
408032	BVES	0.34	13.2	5.29
428628	GRIK2	0	0.09	5.25
100859398	POLD2	0.2	7.41	5.19
100857394	A2ML3	0	0.07	5.17
100859691	LOC100859691	0	0.38	5.17
100858504	LOC100858504	0	0.45	5.16
107055519	LOC107055519	0	0.07	5.15
395814	FMOD	0.35	12.19	5.11
107049025	LOC107049025	0	0.39	5.09
422031	OvoDA1-2	0	1.03	5.09
107049117	LOC107049117	0.07	2.27	5.08
107056487	LOC107056487	0	0.62	4.97
107049223	LOC107049223	0	0.79	4.97
422618	TECRL	0.14	4.36	4.94
426218	LOC426218	0	0.34	4.94
769809	LOC769809	0	0.78	4.93
107052839	LOC107052839	0	0.34	4.8
101747901	LOC101747901	0.63	16.74	4.72
107049538	PPP1R37	0	0.33	4.7
107057021	LOC107057021	0	0.08	4.66
107056068	LOC107056068	0	0.38	4.61
777022	LOC777022	0	0.26	4.59
107055527	LOC107055527	0	0.05	4.58
107056453	LOC107056453	0	0.24	4.56
374101	SCX	0.03	0.82	4.55
107049065	LOC107049065	0	0.1	4.52
107050758	LOC107050758	0.03	0.6	4.5
107057430	LOC107057430	0	0.42	4.48
430280	HSPB7	1.12	24.19	4.45
107050627	LOC107050627	0.02	0.5	4.38
395395	GAD2	0	0.09	4.32
429984	LOC429984	1.2	23.49	4.27
100859897	LOC100859897	0.04	0.69	4.18
431314	LOC431314	0.19	3.39	4.18
101752151	LOC101752151	0.01	0.17	4.17
415470	TMC3	0.04	0.71	4.04
395526	SOX14	0.02	0.33	4
100859616	LOC100859616	6.99	113.89	4
101750594	LOC101750594	0.09	1.26	3.89
396479	LOC396479	0.43	6.27	3.86
107057250	LOC107057250	1.72	24.4	3.82
421903	DLGAP2	0	0.05	3.81
408049	CDH10	0.01	0.1	3.81
107049414	LOC107049414	0.03	0.39	3.8
101751554	LOC101751554	3.95	56.21	3.8
100859586	LOC100859586	10.04	140.82	3.78
416174	GABRP	0.07	0.88	3.71
107049986	LOC107049986	0.58	4.45	3.71
101409260	FK27	0.02	0.37	3.7
396522	CNN1	28.31	362.66	3.66
420391	HHATL	0.36	4.64	3.66
100857679	CORO6	0.5	6.19	3.64
772163	PTPRQ	0.01	0.09	3.63
395906	DES	56.7	680.08	3.6
421369	ATF3	4.43	54.8	3.6
431316	LOC431316	5.86	72.4	3.6
417124	CUTA	0.2	2.4	3.58
769455	TCLEC2B	0.4	4.77	3.58
431317	LOC431317	3.05	37.21	3.58
107054472	LOC107054472	0.01	0.09	3.57
395434	POPDC3	0.13	1.52	3.53
100858282	LOC100858282	1.44	16.58	3.52
107055219	LOC107055219	0.04	0.45	3.49
107055104	LOC107055104	4.67	53.19	3.48
100859722	LOC100859722	10.14	115.45	3.48
404297	CRH	0.05	0.56	3.46
396039	FOXC2	0.02	0.24	3.45
107049767	LOC107049767	0.07	0.76	3.44
769354	LOC769354	1.99	25.28	3.43
107049568	LOC107049568	0.04	0.44	3.42
396084	ACTG2	54.79	576.77	3.41
100859605	LOC100859605	1.21	12.83	3.41
107055697	LOC107055697	0.04	0.39	3.37
101749979	LOC101749979	0.02	0.21	3.36
107049929	LOC107049929	0.12	1.2	3.34
430666	CILP2	0.12	1.24	3.34
107052761	GDF6	0.05	0.48	3.32
428203	ADRA1A	0.15	1.5	3.31
419906	GRM4	0.02	0.25	3.29
395640	CHUNK-1	0.03	0.3	3.28
100859202	LOC100859202	0.2	1.94	3.27
100534591	GTF2A1L	0.02	0.22	3.25
426912	LOC426912	1.32	12.47	3.22
422251	ZIC3	0.13	1.26	3.2
423430	PPP4R4	0.05	0.33	3.17
396393	LCN8	1.94	17.23	3.16
424944	CYP2J2L6	0.01	0.09	3.14
421534	ACTA1	135.92	1184.01	3.12
431323	LOC431323	0.08	0.68	3.12
427430	C1QTNF3	0.18	1.61	3.12
107049191	LOC107049191	0.27	2.34	3.12
427899	2021-09-03	0.03	0.22	3.11
427981	CLIC6	0.07	0.59	3.11
100859657	LOC100859657	4.5	39.62	3.11
100859756	LOC100859756	9.17	80	3.1
107053591	LOC107053591	0.03	0.27	3.03
100857297	LOC100857297	11	91.52	3.03
100857190	LOC100857190	3.38	27.61	3.01
419216	EPB42	0.01	0.1	3
396095	STMN2	0.05	0.36	3
431321	LOC431321	1.06	8.69	3
431363	PCDHGA2	0.01	0.07	2.99
107054538	LOC107054538	0.05	0.41	2.99
101748375	LOC101748375	1.94	17.85	2.98
425362	LOC425362	6.12	46.96	2.95
100859406	ANKK1	0.01	0.09	2.91
420210	ATP6V0D2	0.02	0.17	2.91
429027	B3GALT1	0.05	0.35	2.89
770953	DDO	0.09	0.7	2.88
395805	MYOM1	0.07	0.51	2.87
378926	ANKRD1	0.1	0.75	2.87
101749502	LOC101749502	1.88	13.42	2.84
425031	MME	0.17	1.2	2.82
427267	CAMK4L	0.02	0.12	2.81
100858620	LOC100858620	0.56	4.07	2.81
422193	DRP2	0.15	0.98	2.8
429900	COL25A1	0.36	2.51	2.8
421131	PENK	0.69	4.85	2.8
768978	LOC768978	0.22	1.53	2.79
420389	KLHL40	0.02	0.13	2.78
772158	LOC772158	16.05	111.26	2.78
396007	PMEL	0.04	0.27	2.77
424184	KCNH7	0.09	0.61	2.77
395098	BRINP1	0.38	2.58	2.76
417506	MYL10	0.57	3.7	2.76
107055129	LOC107055129	1.77	12.17	2.76
769384	LOC769384	1.3	8.86	2.75
422979	CSRP3	0.05	0.33	2.74
100857497	LOC100857497	0.03	0.3	2.7
418345	UPK1B	0.23	1.18	2.7
769486	LOC769486	8.48	60.18	2.7
421508	RYR2	0.18	1.14	2.68
100858302	KRT75L4	3.63	23.66	2.68
395615	SHH	0.33	2.12	2.67
374266	XIRP1	0.02	0.13	2.65
107053164	LOC107053164	0.03	0.18	2.65
427868	TRHDE	0.08	0.5	2.64
395069	COL2A1	0.08	0.51	2.64
768814	LOC768814	47.03	296.29	2.63
428903	EFCAB11	0.05	0.3	2.62
374187	PTCH2	0.59	3.54	2.59
420486	LOC420486	0.02	0.11	2.58
101749866	LRTM2	0.2	1.23	2.58
396204	NOV	0.99	5.89	2.57
419244	EEF1A2	0.95	5.57	2.55
374065	KCNMA1	0.69	4.49	2.53
420996	NR4A3	3.29	19.29	2.53
428726	FSTL5	0.11	0.64	2.51
777133	LMX1A	0.31	2.02	2.49
417775	GPR85	0.08	0.46	2.47
428008	RGNL	0.11	0.62	2.46
107057093	LOC107057093	0.24	1.32	2.46
100859310	LOC100859310	0.96	5.38	2.46
431299	KRT75L2	17.56	97.95	2.46
424888	CPB1	0.07	0.41	2.44
414838	CYP11A1	0.08	0.41	2.44
396490	TAGLN	191.41	1014.75	2.42
418179	LMO3	0.04	0.2	2.42
423073	USH1C	0.06	0.31	2.4
396066	AANAT	0.07	0.37	2.4
395881	MAFA	0.07	0.38	2.4
107051007	LOC107051007	0.25	1.29	2.4
429110	PRKAA2	0.59	3.1	2.39
107055393	TESPA1	1.27	6.67	2.39
770009	FOXJ1	0.03	0.19	2.38
107057221	LOC107057221	0.1	0.51	2.37
107049924	LOC107049924	0.11	0.53	2.35
100858111	LOC100858111	0.11	0.56	2.34
107049603	LOC107049603	6.41	32.48	2.34
396433	TNNT2	0.06	0.33	2.32
107049136	LOC107049136	0.84	4.16	2.32
771679	CCLI8	0.11	0.53	2.31
424555	AK5	0.16	0.77	2.31
427867	LGR5	0.25	1.22	2.3
100857579	LOC100857579	86.85	437.99	2.3
428420	CACNB2	0.21	1.03	2.29
415301	STRA6	0.03	0.17	2.27
420952	FHOD3	1.06	5.12	2.27
419770	FXYD2	0.43	2.69	2.26
424786	DNER	0.17	0.79	2.25
431414	LBX3	0.11	0.52	2.23
100858678	LOC100858678	0.03	0.15	2.2
424241	ARHGEF1	0.18	0.72	2.2
769348	DLX4	0.4	1.85	2.2
421858	HTR1B	2.38	10.84	2.2
776071	NEK10	0.06	0.27	2.19
423610	LDB3	0.37	1.69	2.19
421758	METTL24	0.18	0.81	2.18
419936	LOC419936	0.56	2.69	2.18
428832	CYP1C1	0.06	0.31	2.17
420409	NACAD	0.09	0.4	2.17
423756	PITX3	0.11	0.5	2.17
418652	GPR143	0.17	0.76	2.17
404229	POPDC2	1.78	9.47	2.17
396213	TNR	0.03	0.13	2.16
419047	MANSC4	0.07	0.31	2.16
422045	CRISP2	0.63	2.87	2.15
107049278	LOC107049278	119.92	543.5	2.15
427666	C1QTNF8	0.25	1.07	2.14
107056462	LOC107056462	0.1	0.46	2.13
107053289	LOC107053289	0.14	0.61	2.13
374211	CRABP1	0.45	2.01	2.13
771389	TMEM132E	0.09	0.39	2.11
427999	PPEF1	0.12	0.49	2.11
418903	DCLK1	0.3	1.23	2.1
770684	LOC770684	0.56	2.42	2.1
107049143	LOC107049143	1.23	6.23	2.1
427409	DNAJB5	1.91	8.15	2.1
395912	MGP	37.76	160	2.08
421880	BAG2	19	80.42	2.08
417809	SLC38A4	0.85	3.55	2.07
395423	HINTW	40.83	173.19	2.06
769742	SCG5	0.25	1.04	2.06
422287	SLITRK4	0.02	0.1	2.05
107052201	LOC107052201	0.11	0.44	2.05
422950	EGR4	0.28	1.16	2.05
418895	TRPC4	0.28	1.17	2.05
101749628	LOC101749628	0.38	1.59	2.05
373895	TBX22	0.08	0.34	2.04
101751469	LOC101751469	0.19	0.78	2.04
424533	VTG2	0.02	0.09	2.03
428616	CLVS2	0.03	0.11	2.03
395279	MYH7B	0.09	0.35	2.03
428155	RSPO4	0.46	1.96	2.02
422019	PNOC	0.33	1.24	2
107056404	LOC107056404	0.78	3.06	2
373971	TYR	0.15	0.6	1.99
416507	RASD1	2.06	8.09	1.98
107049285	LOC107049285	0.4	1.58	1.97
107054241	LOC107054241	0.13	0.5	1.96
428702	LOC428702	0.15	0.56	1.96
100858647	LOC100858647	12.79	49.9	1.96
100859612	EMID1	1.87	7.24	1.95
107051810	LOC107051810	0.03	0.1	1.94
100858840	LOC100858840	1.02	4.71	1.94
425347	LOC425347	0.49	1.89	1.93
395094	FGFBP2	0.22	0.93	1.92
428421	LOC428421	0.15	0.58	1.91
420094	ATCAY	0.04	0.17	1.89
414136	HSPB2	0.13	0.86	1.89
373964	MSTN	0.18	0.68	1.89
423428	ASB2	0.72	2.96	1.89
107050639	LOC107050639	0.18	0.64	1.88
428652	KCNF1	0.2	0.74	1.88
417883	NTS	0.26	0.95	1.88
423892	RBM20	0.06	0.24	1.87
417389	CA10	0.1	0.36	1.87
420039	LOC420039	15.75	58.63	1.87
768703	SHISA6	0.08	0.27	1.85
396214	PLP1	1.23	4.46	1.84
107049100	LOC107049100	1.46	5.28	1.84
430910	LOC430910	3.99	14.57	1.84
772080	LOC772080	49.39	178.92	1.84
424019	MLPH	0.14	0.52	1.83
770370	RAB3C	0.03	0.12	1.82
429363	APC2	0.4	1.42	1.82
396176	CSRP1	346.23	1190.62	1.81
101750591	LOC101750591	0.07	0.23	1.81
107056508	LOC107056508	6.15	21.89	1.81
769085	LACTBL1	0.06	0.22	1.8
408035	EGF	0.03	0.09	1.79
418923	MTUS2	0.04	0.14	1.79
107052661	LOC107052661	0.1	0.35	1.79
107057292	LOC107057292	0.27	0.93	1.79
423838	SFRP5	0.58	2.02	1.79
769229	CWH18ORF25	0.44	1.54	1.78
777044	LOC777044	0.61	2.15	1.78
421559	SMOC2	2.18	7.48	1.78
419557	FABP3	52.31	180.53	1.78
396151	OVST	0.14	0.49	1.77
768688	SMOC1	1.15	3.96	1.77
107050429	LOC107050429	116.53	405.57	1.77
428699	FRMPD3	0.3	1.02	1.76
417881	SLC6A15	0.47	1.61	1.76
100857380	LOC100857380	3.89	13.06	1.75
770600	KCTD8	0.24	0.81	1.74
107051427	LOC107051427	0.77	2.59	1.74
777191	SUB1L2	1.26	4.28	1.74
107051557	LOC107051557	1.03	3.41	1.73
427010	LOC427010	1.39	4.53	1.73
418089	STAB2	0.06	0.19	1.72
374195	LOC374195	2.06	6.91	1.72
416212	LOC416212	0.2	0.67	1.71
418151	NINJ2	0.66	2.18	1.71
426943	PLIN5	1.73	5.64	1.71
396107	RET	2.62	8.57	1.71
419915	APOBEC2	2.95	9.6	1.71
420278	KCNV1	0.24	0.78	1.7
771876	LOC771876	0.36	1.17	1.7
107049482	LOC107049482	1.1	3.65	1.7
107055444	LOC107055444	1.37	4.56	1.7
419539	LRRTM4	0.19	0.59	1.69
395393	SNCA	1.89	6.1	1.69
421589	FNDC1	2.81	9.18	1.69
771220	PCP4	63.86	204.31	1.68
771655	PLA2G5	0.15	0.48	1.68
770025	LOC770025	35.14	114.9	1.68
770671	MMEL1	0.03	0.1	1.67
101749102	DSCR6	0.43	1.37	1.67
423786	LOC423786	0.43	1.38	1.67
107049046	LOC107049046	34.64	112.34	1.67
107057478	LOC107057478	0.52	1.68	1.66
395776	LHCGR	0.58	1.84	1.66
430557	ACACB	1.13	3.52	1.66
107049174	LOC107049174	2.7	8.72	1.66
404755	THRSP	54.91	172.64	1.65
428801	FOXI3	0.19	0.59	1.65
395648	GPRIN2	0.42	1.33	1.65
407091	UBAP2	2.87	9.16	1.65
431003	LOC431003	3.3	10.59	1.65
427134	UBE2R2L	3.56	11.35	1.65
101752211	LOC101752211	4.5	14.31	1.65
419135	FER1L4	0.08	0.23	1.64
101751326	TMIGD1	0.21	0.65	1.64
408180	LOC408180	0.67	2.05	1.64
420657	LRRC3B	0.98	2.98	1.63
428577	CDC42EP3	14.87	45.56	1.63
426516	HNRPK	16.28	51.86	1.63
428234	HEPACAM	0.45	1.36	1.62
427355	FREM1	0.5	1.6	1.62
417180	LAMC3	0.86	2.66	1.62
420120	COMP	12.23	39.34	1.62
100859733	CIDEC	13.04	40.19	1.62
395599	SYNM	13.33	40.72	1.62
396045	GLI1	0.53	1.63	1.61
430766	LOC430766	13.95	43.22	1.6
424901	ATP13A4	0.06	0.19	1.59
107053676	TLL2	0.09	0.28	1.59
107050516	LOC107050516	0.44	1.31	1.59
395458	SLC6A2	1.03	2.03	1.59
407088	MASP1	2.09	6.35	1.59
427308	ALDOB	5.74	17.35	1.59
396109	FOXD1	0.23	0.69	1.58
374014	SPINW	2	6.12	1.58
418794	GPC6	0.02	0.07	1.57
107054378	LOC107054378	0.15	0.43	1.57
107055430	LOC107055430	0.33	1	1.57
107055431	LOC107055431	0.38	1.15	1.57
421644	OPRM1	0.21	0.65	1.56
429941	ISLR2	1.48	4.4	1.56
424320	NR4A2	4.22	12.47	1.56
424552	NEXN	10.2	30.05	1.56
429025	KLHL23	0.12	0.37	1.55
395910	PADI3	0.16	0.47	1.55
395683	MMP13	0.41	1.21	1.55
396260	AVD	1.04	3.04	1.55
395552	CCL1	5.44	13.06	1.55
107056563	LOC107056563	0.22	0.64	1.54
395634	ELAVL4	0.36	0.98	1.54
107052568	LOC107052568	0.58	1.73	1.54
415652	CCL17	10.79	31.55	1.54
417859	CAPS2	0.06	0.19	1.53
421471	VIT	0.31	0.89	1.53
107050791	LOC107050791	1.6	4.56	1.53
101751363	LOC101751363	6.56	18.55	1.53
431664	RXFP3	0.05	0.14	1.52
418099	MYBPC1	0.06	0.18	1.52
396231	RXRG	1.56	4.51	1.52
107049459	LOC107049459	1.61	4.7	1.52
425531	LOC425531	44.96	129.45	1.52
425711	C8ORF22	0.35	1.06	1.5
107055424	LOC107055424	0.8	2.28	1.49
427025	LOC427025	1.7	4.86	1.49
422460	HHIP	0.25	0.71	1.48
107057343	LOC107057343	0.95	2.72	1.48
107049041	LOC107049041	0.95	2.72	1.48
107056097	LOC107056097	1.08	2.98	1.48
378800	SOSTDC1	3.45	9.86	1.48
420692	TMEM108	0.34	0.94	1.47
424263	GPD1L2	9.99	27.61	1.46
421598	KIAA1549L	0.07	0.21	1.45
378797	GJB1	0.79	2.15	1.45
420842	GMPR	0.92	2.5	1.45
396485	HBG2	3.99	10.81	1.45
420847	CAP2	16.7	45.31	1.45
418917	HSPH1	29.94	82.02	1.45
770104	NLGN3	2.49	6.77	1.44
107049047	LOC107049047	7.33	20.31	1.44
107057018	LOC107057018	0.51	1.34	1.43
107055428	LOC107055428	0.65	1.8	1.43
421561	DACT2	0.71	1.94	1.43
426615	LOC426615	1.39	3.79	1.43
427762	FIBCD1	0.08	0.23	1.42
421775	SOBP	1.39	3.72	1.42
415296	ACTG1	32.63	87.5	1.42
100858894	SMTN	39.57	108.03	1.42
374083	DAB1	0.06	0.17	1.41
423050	NRIP3	0.18	0.46	1.41
107057546	LOC107057546	0.18	0.49	1.41
107050065	LOC107050065	2.1	5.48	1.41
424125	SESTD1	18.65	49.71	1.41
416268	CCDC69	2.9	7.65	1.4
396512	FOS	50.65	133.52	1.4
418640	FRMPD4	0.15	0.38	1.39
423563	MDGA2	0.19	0.49	1.39
416371	BHMT	1.38	3.62	1.39
396217	MBP	6.63	18.54	1.39
422305	LOC422305	0.36	0.94	1.38
107050496	LOC107050496	1.3	3.36	1.38
396032	TNNC1	2.83	7.31	1.38
424644	FAM159A	0.39	1.04	1.37
107049937	LOC107049937	1.31	3.39	1.37
100858122	KCNH2	2.15	5.55	1.37
101751930	CCDC169	0.13	0.34	1.36
395730	KCNAB1	0.59	1.5	1.36
101749800	LRRC26	1.33	3.4	1.36
395130	OPTC	1.43	3.62	1.36
426913	LOC426913	1.86	4.87	1.36
107056096	LOC107056096	5.28	13.62	1.36
431564	ATP5A1W	8.44	21.88	1.36
427649	IGFALS	0.38	0.95	1.35
395190	P2RX1	27.46	70.67	1.35
101750778	CCDC36	0.32	0.79	1.34
107056915	LOC107056915	0.42	1.07	1.34
419243	COL20A1	0.68	1.71	1.34
100859779	LOC100859779	5.9	15.26	1.34
428310	HSP25	95.71	243.55	1.34
395483	SOX8	0.56	1.4	1.33
100857112	LOC100857112	0.73	1.82	1.33
100857433	PLIN4	57.89	146.72	1.33
426549	RETSAT	45.74	114	1.32
427249	TRPM3	0.05	0.11	1.32
101752127	ANKRD61	0.19	0.47	1.32
107051462	LOC107051462	0.24	0.58	1.32
420203	RALYL	0.26	0.69	1.32
428459	ARPP21	5.49	13.51	1.31
107049297	LOC107049297	0.28	0.69	1.3
421743	BET3L	0.3	0.74	1.29
100857910	ARTN	0.35	0.85	1.28
100857831	YJEFN3	0.39	0.57	1.28
427971	ADAMTS5	1.18	2.88	1.28
396336	NCS1	7.88	18.1	1.28
396417	BG2	8.49	20.94	1.28
415487	PLIN1	103.53	252.51	1.28
395167	FAT3	0.1	0.26	1.27
100857799	KCNJ10	0.22	0.53	1.27
415485	KIAA1024	0.25	0.54	1.27
417616	SLC47A2	0.29	0.69	1.27
421104	DTNA	3.22	7.8	1.27
395201	SH3GL3	3.79	9.18	1.27
419613	RSPO1	0.33	0.79	1.26
428741	MMRN1	0.34	0.81	1.26
770761	MSLNL	0.97	2.31	1.26
770226	GNAZ	0.36	0.87	1.25
107055427	LOC107055427	0.39	0.93	1.25
100857682	LOC100857682	0.56	1.34	1.25
423277	LOC423277	1.99	4.69	1.25
422546	SLC25A4	8.26	19.6	1.25
396211	MYH11	261.04	610.62	1.24
396227	HSPB1	171.99	406.09	1.24
418078	ALDH1L2	0.87	2.04	1.24
395176	EBF2	1.04	2.42	1.24
771582	GNG4	0.8	1.76	1.23
395657	SPON1	1.08	2.54	1.23
420803	COL15A1	2.13	5.03	1.23
421715	RSPO3	5.16	12.08	1.23
415576	FRMD5	0.15	0.34	1.22
100858742	LOC100858742	0.38	0.91	1.22
421709	LAMA2	3.21	7.48	1.22
396215	MYL9	547.68	1263.04	1.21
423776	GDF10	0.18	0.43	1.21
417787	PDZRN4	0.45	1.05	1.21
107050524	LOC107050524	0.54	1.26	1.21
100859467	LOC100859467	1.02	2.42	1.21
421662	TAGAP	6.15	14.17	1.21
404779	NOCT	6.44	15.12	1.21
416280	NPY7R	0.11	0.65	1.2
423451	PKDCCb	0.3	0.7	1.2
396053	BMP5	0.46	1.11	1.2
100857553	LOC100857553	2.16	4.63	1.2
107052560	LOC107052560	2.32	5.33	1.2
101747958	LOC101747958	9.29	21.37	1.2
396366	TPM1	268.77	591.8	1.19
421697	TCF21	0.78	1.79	1.19
419492	DRAXIN	1.2	2.77	1.19
428015	EDAR	2.94	6.62	1.19
419824	NFASC	3.61	8.22	1.19
431595	FAM169A	0.08	0.19	1.18
396312	LMX1B	0.77	1.75	1.18
429124	PCOLCE2	6.51	14.8	1.18
419827	TMCC2	6.16	14.15	1.17
107055258	LOC107055258	1.73	3.91	1.16
107049606	LOC107049606	2.75	6.02	1.16
107057193	LOC107057193	2.75	6.02	1.16
107057192	LOC107057192	2.75	6.02	1.16
416635	TEKT5	0.4	0.89	1.15
419316	APCDD1L	2.92	6.49	1.15
100859704	LOC100859704	0.12	0.26	1.14
429219	RNF157	0.19	0.4	1.14
107057099	LOC107057099	3.25	7.2	1.14
417647	CA4	6.08	13.39	1.14
107055390	LOC107055390	6.96	15.37	1.14
420174	SLCO5A1	0.2	0.44	1.13
423420	CHGA	0.48	1.05	1.13
374033	UGT8	0.7	1.52	1.13
107056465	LOC107056465	1.24	2.7	1.13
431663	NPR3	1.79	3.86	1.13
769245	CLDN19	1.93	4.19	1.13
107057382	LOC107057382	4.31	9.42	1.13
416987	CCDC60	0.31	0.67	1.12
107049259	LOC107049259	0.58	1.25	1.12
430981	GABRR3	1.25	2.76	1.12
428955	CH17-360D5.1	1.39	3.36	1.12
425989	PRMT8	1.41	3.11	1.12
404530	TNMD	3.98	8.7	1.12
769000	LOC769000	6.03	13.06	1.12
768858	CD2	0.19	0.42	1.11
418130	PKP2	0.26	0.57	1.11
422933	ADRA1D	0.84	1.82	1.11
422506	FRAS1	1.41	3.03	1.11
107055926	LOC107055926	1.66	3.58	1.11
427247	MAMDC2	1.82	3.96	1.11
423026	SYT9	1	2.19	1.1
420540	STEAP1	1.17	2.51	1.1
428436	TRIL	1.63	3.5	1.1
424325	ACVR1C	4.03	8.55	1.1
416335	SHROOM1	0.22	0.55	1.09
421088	AQP4	0.4	0.82	1.09
416304	SPOCK1	0.99	2.12	1.09
101751094	LOC101751094	1.15	2.47	1.09
423079	HPS5	2.3	4.91	1.09
431066	PNPLA2	34.87	74.4	1.09
419860	G0S2	61.57	131.74	1.09
420231	CCNE2	0.62	1.31	1.08
771265	CBLN1	0.69	1.47	1.08
421562	FRMD1	1.21	2.56	1.08
395420	F13A1	9.56	20.42	1.08
395267	FMO3	15.02	31.91	1.08
418306	KEL	0.21	0.44	1.07
107055483	LOC107055483	0.33	0.71	1.07
420753	PPP1R17	0.41	0.87	1.07
107050640	LOC107050640	0.42	0.89	1.07
422078	NPTX1	0.66	1.4	1.07
107050961	LOC107050961	0.76	1.6	1.07
770416	SAPCD2	1.14	2.39	1.07
420846	RBM24	2.54	5.29	1.07
396015	HSD3B2	6.14	12.72	1.07
772190	RD3L	0.48	1	1.06
395468	CCL4	2.7	5.57	1.06
424507	CDC7	0.67	1.38	1.05
424117	PPP1R1C	1.11	2.38	1.05
429089	CYR61	34.74	72.09	1.05
374165	FABP4	546.13	1125.35	1.04
428778	LOC428778	0.18	0.37	1.04
395759	SLC8A3	0.46	0.93	1.04
416101	CNTN3	0.48	0.98	1.04
396126	INHBB	0.65	1.46	1.04
101747620	LOC101747620	0.7	1.42	1.04
395389	ALDH1A3	2.85	5.88	1.04
395305	SSTR2	10.22	21.64	1.04
107055731	LOC107055731	12.25	25.37	1.04
395332	TES	18.06	36.4	1.04
769665	CHAD	67.38	139.01	1.04
395877	SERPIND1	0.63	1.28	1.03
771058	BMP8B	1.54	3.1	1.03
429032	LOC429032	1.63	3.34	1.03
373967	SLIT2	2	4.13	1.03
416223	CDHR2	0.16	0.32	1.02
415963	SYN2	0.51	1.03	1.02
100859602	LOC100859602	0.66	1.34	1.02
395941	HGF	0.72	1.47	1.02
420403	TNFRSF14	1.42	2.88	1.02
772271	LOC772271	1.62	3.36	1.02
107051521	DNM2	2.48	5.01	1.02
107056239	LOC107056239	8.4	16.96	1.02
396441	ELN	31.69	64.66	1.02
100857341	LOC100857341	1.74	3.52	1.01
414336	ST8SIA2	1.91	4.39	1.01
420744	BMPER	2.04	4.22	1.01
395573	SOX10	2.44	4.89	1.01
107053633	EGR2	2.45	4.96	1.01
419818	PI16	12.1	24.73	1.01
100859495	CTXN2	0.27	0.53	1
395953	IGF2BP1	0.37	0.76	1
419830	LOC419830	0.91	1.86	1
777386	LOC777386	1.08	2.17	1
100857686	LOC100857686	2.02	4.03	1
771706	C27H17ORF105	22.91	46.14	1
373931	EGR1	66.6	134.09	1
107051973	LOC107051973	1.89	0.94	-1
100858824	LOC100858824	1.17	0.58	-1.01
431599	ZNF366	1.25	0.62	-1.01
100857280	LOC100857280	1.57	0.77	-1.02
420537	ADAM22	4.85	2.38	-1.02
770082	HSPA12B	1.19	0.57	-1.03
100857706	LOC100857706	7.27	3.52	-1.03
107055532	LOC107055532	0.41	0.2	-1.04
421631	IYD	1.42	0.68	-1.04
107056634	LOC107056634	1.98	0.95	-1.04
107054305	LOC107054305	8.8	4.26	-1.04
416307	IL9	29.69	13.89	-1.04
776018	LOC776018	1.05	0.5	-1.05
107049949	LOC107049949	2.1	1.02	-1.05
417013	LOC417013	3.61	1.73	-1.05
770109	CTSH	47.69	23.02	-1.05
396287	HMOX1	54.51	26.46	-1.05
419426	TTLL10	0.35	0.17	-1.06
423898	HABP2	1.53	0.73	-1.06
107051157	LOC107051157	3.12	1.49	-1.06
416526	CACNA1H	3.58	1.73	-1.06
417192	LOC417192	3.59	1.72	-1.06
424300	LOC424300	0.14	0.07	-1.07
417379	CCDC57	1.84	0.88	-1.07
101750517	LOC101750517	4.82	2.27	-1.07
770869	MGARP	2.1	1	-1.08
395203	SH3GL2	2.85	1.36	-1.08
419528	NEFL	3.48	1.66	-1.08
100857191	LOC100857191	17.58	8.32	-1.08
408038	LOC408038	249.05	118.94	-1.08
100857889	PLCXD3	0.6	0.28	-1.09
422276	LOC422276	2.71	1.27	-1.09
427406	CCL19	4.39	2.05	-1.09
428295	LOC428295	1.33	0.63	-1.1
418426	BTLA	2.05	0.92	-1.1
395087	TSPAN32	1.09	0.51	-1.11
772385	GPR21	1.65	0.76	-1.11
107056000	LOC107056000	0.89	0.41	-1.12
107050224	LOC107050224	1.15	0.52	-1.12
107052466	LOC107052466	1.33	0.61	-1.12
107054679	LOC107054679	2.01	0.92	-1.12
426796	SNCAIP	7.4	3.38	-1.12
768936	ALPK3	0.19	0.09	-1.13
416928	IGLL1	109.06	49.94	-1.13
107054480	LOC107054480	0.33	0.15	-1.14
395342	CRTAM	0.67	0.31	-1.14
395076	CDKN2B	1.54	0.7	-1.14
426920	UNC5D	0.62	0.28	-1.15
417749	SPAM1	0.29	0.13	-1.16
107051395	LOC107051395	0.72	0.32	-1.16
101748207	LOC101748207	0.8	0.37	-1.16
100859040	IL17C	0.87	0.39	-1.16
769254	CBLN4	1.11	0.49	-1.16
107056565	LOC107056565	7.95	3.56	-1.16
395451	CXCL14	153.72	68.83	-1.16
422295	LOC422295	0.66	0.28	-1.17
107049268	LOC107049268	0.97	0.42	-1.17
422106	LOC422106	1.51	0.68	-1.17
107050706	LOC107050706	6.19	2.75	-1.17
423001	LUZP2	1.52	0.65	-1.18
417831	WIF1	5.99	2.67	-1.18
427937	WNT7B	8.96	3.98	-1.18
768734	SPINK4	2.55	1.09	-1.2
426168	GZMK	1.88	0.81	-1.21
431584	CD180	3.14	1.35	-1.21
374117	IGJ	16.03	6.95	-1.21
776186	TMEM158	41.37	17.84	-1.21
101749460	LOC101749460	0.45	0.2	-1.22
395837	FGG	6.14	2.61	-1.22
107049467	LOC107049467	0.53	0.22	-1.23
418688	VWA3B	0.25	0.11	-1.24
107053269	LOC107053269	5.52	2.32	-1.24
427400	LOC427400	24.24	10.14	-1.24
420261	BAALC	2.08	0.88	-1.25
418411	SH2D1B	4.08	1.31	-1.25
419333	LOC419333	6.27	2.63	-1.25
395979	ADH6	3.77	1.58	-1.26
428072	MLNR	3.99	1.67	-1.26
428443	EOMES	0.75	0.31	-1.27
422419	NPY5R	0.75	0.43	-1.27
107056268	LOC107056268	0.95	0.39	-1.27
107055538	LOC107055538	1.64	0.68	-1.27
100857420	SYN3	0.79	0.32	-1.28
770916	MGST2	11.52	4.76	-1.28
415396	FAM81A	0.6	0.22	-1.29
107049669	LOC107049669	1.05	0.43	-1.29
429059	RGS13	0.79	0.32	-1.3
100858433	LOC100858433	0.59	0.24	-1.31
101749071	PROX2	1.33	0.53	-1.31
100857700	LOC100857700	1.25	0.5	-1.32
107054223	LOC107054223	4.55	1.82	-1.32
107054471	LOC107054471	0.32	0.13	-1.34
418881	NEK5	0.43	0.17	-1.34
427746	YF5	3.08	1.17	-1.35
769119	SNX22	15.54	6.04	-1.35
771388	LOC771388	0.22	0.08	-1.39
107056175	LOC107056175	1.19	0.45	-1.39
426373	MEF2B	6.34	2.4	-1.39
107049066	LOC107049066	2.99	1.14	-1.4
100859517	NRGN	1.58	0.58	-1.42
107049164	LOC107049164	1.26	0.47	-1.43
100858023	LOC100858023	0.16	0.06	-1.44
107049354	LOC107049354	1.84	0.67	-1.44
101749972	LOC101749972	0.26	0.09	-1.45
101749743	LOC101749743	0.16	0.06	-1.46
107051274	LOC107051274	5.1	1.87	-1.46
421093	OPN5L1	5.44	1.99	-1.46
415743	NETO2	1.05	0.35	-1.47
423488	TDRD9	0.33	0.12	-1.48
107049916	LOC107049916	0.52	0.18	-1.48
396434	TNNC2	1.18	0.42	-1.49
101751240	LOC101751240	2.36	0.84	-1.49
107049974	LOC107049974	6.82	2.39	-1.49
107056098	LOC107056098	0.89	0.31	-1.5
419080	LOC419080	3.63	1.28	-1.5
107054169	LOC107054169	1.1	0.39	-1.51
107054168	LOC107054168	1.1	0.39	-1.51
427435	SPEF2	0.43	0.15	-1.52
395383	SLC16A3	4.13	1.44	-1.52
101748867	LOC101748867	0.2	0.07	-1.53
101749540	LOC101749540	0.42	0.15	-1.53
768684	CAPN14	3.21	1.11	-1.53
396273	GSC	1.37	0.47	-1.54
417122	C5	0.15	0.05	-1.55
396391	GATA5	0.64	0.22	-1.55
395829	WNT9A	2.18	0.75	-1.55
414885	CCKBR	1.43	0.45	-1.56
395689	ENO2	3.33	1.14	-1.56
107056994	LOC107056994	1.21	0.41	-1.57
768588	SLAMF8	0.39	0.13	-1.58
100857468	LOC100857468	1.31	0.44	-1.58
107056877	LOC107056877	1.07	0.36	-1.59
107056364	LOC107056364	2.93	0.97	-1.6
107051791	LOC107051791	8.92	2.96	-1.6
771871	LOC771871	0.18	0.06	-1.61
107057609	LOC107057609	0.61	0.2	-1.65
107057006	LOC107057006	0.78	0.17	-1.65
430600	LOC430600	25.82	7.28	-1.67
422543	LRP2BP	3.13	0.96	-1.69
107054465	LOC107054465	0.39	0.12	-1.74
420265	DCSTAMP	2.97	0.88	-1.75
107055625	LOC107055625	0.25	0.07	-1.76
101749756	LOC101749756	2.14	0.63	-1.76
107049803	LOC107049803	3.38	0.99	-1.76
419931	CHIA-M31	0.45	0.13	-1.77
422520	GRID2	0.55	0.16	-1.77
100859690	LOC100859690	1.36	0.41	-1.77
107055648	LOC107055648	2.09	0.63	-1.77
396083	SYT1	4.34	1.26	-1.77
107055520	LOC107055520	0.24	0.07	-1.79
428490	CDH18	0.19	0.05	-1.8
100858332	LOC100858332	1.47	0.42	-1.81
769322	STARD4	16.65	4.73	-1.81
419269	RAD21L1	0.36	0.1	-1.82
395108	GZMA	2.29	0.65	-1.82
101750175	LOC101750175	2.38	0.66	-1.84
101749640	LOC101749640	0.14	0.04	-1.86
395163	FSTL4	1	0.29	-1.86
101750407	PLEKHS1	0.55	0.15	-1.87
107050354	LOC107050354	6.95	1.83	-1.87
107057206	LOC107057206	6.95	1.83	-1.87
107050546	LOC107050546	6.95	1.83	-1.87
107051294	QPRT	2.41	0.64	-1.89
107053055	LOC107053055	0.17	0.04	-1.93
420894	SERPINB1	1.09	0.28	-1.96
395086	F7	0.34	0.09	-2
101751444	LOC101751444	0.5	0.12	-2.01
768553	LOC768553	0.2	0.05	-2.04
417518	STYXL1	0.59	0.14	-2.06
107056839	LOC107056839	1.27	0.3	-2.07
770845	NELL1	0.24	0.06	-2.08
425968	KRTAP10-4	1.53	0.36	-2.09
424018	PRLH	2.26	0.53	-2.09
769014	TLR2B	0.41	0.09	-2.12
428293	LOC428293	1.05	0.25	-2.12
107049264	LOC107049264	3	0.66	-2.17
100858100	LOC100858100	0.92	0.21	-2.18
107056419	LOC107056419	3.26	0.71	-2.21
107050059	LOC107050059	0.68	0.14	-2.31
107057026	LOC107057026	1.05	0.2	-2.36
428124	ART7B	0.57	0.1	-2.39
107055533	LOC107055533	0.26	0.05	-2.41
107053417	LOC107053417	0.56	0.1	-2.51
420461	ADARB2	0.08	0.01	-2.52
101748499	LOC101748499	0.09	0.02	-2.61
107055265	LOC107055265	1.4	0.22	-2.66
101750872	LOC101750872	0.08	0.01	-2.72
770114	LOC770114	0.72	0.1	-2.79
107057003	LOC107057003	0.43	0.06	-2.8
107049366	LOC107049366	0.43	0.06	-2.81
107050064	LOC107050064	9.68	1.39	-2.81
416906	SEZ6L	0.13	0.02	-2.86
107056781	LOC107056781	0.53	0.07	-2.86
107052494	LOC107052494	0.64	0.09	-2.86
107054166	LOC107054166	1.87	0.25	-2.93
101751189	LOC101751189	0.84	0.11	-2.95
107054658	LOC107054658	0.35	0.04	-3.01
107055776	LOC107055776	0.32	0.04	-3.03
429485	ART1	0.54	0.06	-3.06
107056701	LOC107056701	2.22	0.25	-3.14
100859620	LOC100859620	1.46	0.16	-3.2
693257	GNLY	25.37	2.39	-3.39
100857826	LOC100857826	0.16	0.01	-3.44
107055952	LOC107055952	0.55	0.05	-3.44
107056779	LOC107056779	1.51	0.14	-3.45
419908	IP6K3	0.43	0.04	-3.46
107056999	LOC107056999	1.08	0.1	-3.46
423899	NRAP	2.32	0.19	-3.6
100858069	LOC100858069	1.1	0.09	-3.61
395661	CHAT2	0.39	0.03	-3.65
418390	GPR128	0.57	0.05	-3.7
107055266	LOC107055266	0.64	0.05	-3.8
107055268	LOC107055268	0.64	0.05	-3.8
107055269	LOC107055269	0.64	0.05	-3.8
428299	LOC428299	0.37	0.03	-3.82
107050687	LOC107050687	0.28	0.02	-3.84
429696	GBP7	0.77	0.05	-3.86
107055087	LOC107055087	0.71	0.05	-3.89
396383	ISL1	1.54	0.13	-3.94
420944	VWC2	0.38	0.02	-3.95
428125	ART7C	2.17	0.13	-4.06
107057467	LOC107057467	1.03	0.06	-4.19
100858738	PNMT	0.43	0.02	-4.32
107054165	LOC107054165	1.09	0.05	-4.39
107057466	LOC107057466	0.66	0.03	-4.42
421720	NKAIN2	0.29	0	-4.46
107050233	LOC107050233	0.21	0.01	-4.48
100857839	LOC100857839	0.2	0	-4.49
107056976	LOC107056976	0.28	0	-4.54
107057007	LOC107057007	0.33	0	-4.6
107056417	LOC107056417	0.06	0	-4.63
107050530	LOC107050530	0.34	0.01	-4.63
107049940	LOC107049940	0.42	0	-4.63
107056022	LOC107056022	0.4	0	-4.64
107050867	LOC107050867	0.09	0	-4.67
415343	RGPD1	0.04	0	-4.69
100857906	LOC100857906	0.36	0	-4.75
107055571	LOC107055571	0.1	0	-4.88
107055546	LOC107055546	0.06	0	-4.95
107056963	LOC107056963	0.16	0.01	-4.98
107052442	LOC107052442	0.39	0	-5
107055130	LOC107055130	0.2	0	-5.08
107057153	LOC107057153	0.45	0	-5.11
417310	MYH1C	0.06	0	-5.17
107050712	LOC107050712	0.27	0	-5.19
107057458	LOC107057458	0.41	0	-5.19
107057610	LOC107057610	0.17	0	-5.2
769852	LOC769852	0.78	0	-5.22
107050125	LOC107050125	0.32	0	-5.27
107050100	LOC107050100	0.49	0	-5.29
107052383	LOC107052383	0.34	0	-5.31
107050132	LOC107050132	0.1	0	-5.33
107049152	LOC107049152	0.68	0	-5.46
107055938	LOC107055938	1.09	0	-5.64
426957	LOC426957	0.69	0	-5.67
107057409	LOC107057409	0.15	0	-5.68
107056406	LOC107056406	0.88	0	-5.79
771176	LOC771176	0.14	0	-6.07
422922	LOC422922	0.57	0	-6.24
107052384	LOC107052384	0.36	0	-6.43
107057463	LOC107057463	0.48	0	-6.46
107057462	LOC107057462	1.11	0	-6.67
107057539	LOC107057539	1.27	0	-6.68
107049159	LOC107049159	0.25	0	-6.91
107057474	LOC107057474	0.69	0	-6.97
107057201	LOC107057201	1.93	0.01	-6.97
107057460	LOC107057460	1.99	0	-6.98
420559	SAMD9L	0.21	0	-7.12
107057008	LOC107057008	0.53	0	-7.49
107057469	LOC107057469	1.66	0	-8.25
